# Supplementary material for: Imaging of Ag NP transport through collagen-rich microstructures in fibroblast multicellular spheroids by high-resolution laser ablation inductively coupled plasma time-of-flight mass spectrometry
Source: Royal Society of Chemistry journal article supplement (doi:10.1039/c9an00856j), 2019-01-01
Supplement: c9an00856j1.pdf [file c9an00856j1.pdf]

Electronic Supplementary Material (ESI)

**Table S-1.** Information of Ag NP based on the one provided by the manufacture.

|                                             | 5 nm                   | 20 nm                  | 20 nm (PVP)                      | 50 nm                 |
|---------------------------------------------|------------------------|------------------------|----------------------------------|-----------------------|
| Surface coating                             | Citrate                | Citrate                | Polyvinylpyrrolidone<br>(40 kDa) | Citrate               |
| Diameter<br>(TEM)                           | 4.7 ± 1 nm             | 19 ± 3 nm              | 20 ± 3 nm                        | 48 ± 5 nm             |
| Hydrodynamic diameter<br>(DLS)              | Not reported           | 25 nm                  | 41 nm                            | 48 nm                 |
| Particle number<br>(5 µg mL <sup>-1</sup> ) | 9.5 × 10 <sup>12</sup> | 1.5 × 10 <sup>11</sup> | 1.3 × 10 <sup>11</sup>           | 7.5 × 10 <sup>9</sup> |
| Zeta potential                              | Not reported           | -43 mV                 | -32 mV                           | -47 mV                |

**Table S-2.** Operational parameters of the ICP-MS instruments.

|                                  |                                                         |
|----------------------------------|---------------------------------------------------------|
|                                  | For imaging                                             |
|                                  | TOFWERK                                                 |
| Mass spectrometer                | Time of flight                                          |
| RF plasma source power           | 1400 W                                                  |
| Plasma gas flow rate             | 15 L min <sup>-1</sup> Ar                               |
| Auxiliary gas flow rate          | 0.9 L min <sup>-1</sup> Ar                              |
| Material of cone                 | Nickel                                                  |
| Mass resolution ( $m/\Delta m$ ) | 6,000( $m/\Delta m$ , Full width half<br>maximum: FWHM) |
| Spectral averaging time          | 20 ms                                                   |
| Make-up gas flow rate            | 1.1 L min <sup>-1</sup> Ar                              |
| Carrier gas flow rate (LA)       | 0.60 L min <sup>-1</sup> He                             |

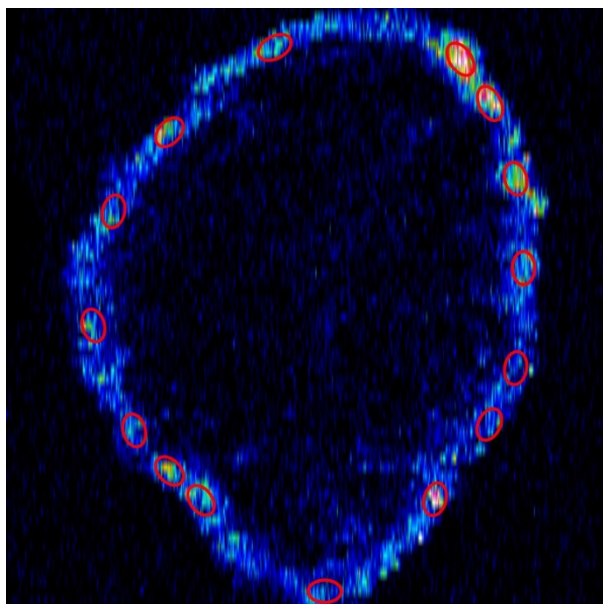

**Figure S-1.** Schematic illustration of 15 areas of interest with red circles on the Ag image of the sample treated with Ag NP ( $\varnothing$  5 nm, citrate) for 48 hours, which is shown as an example.

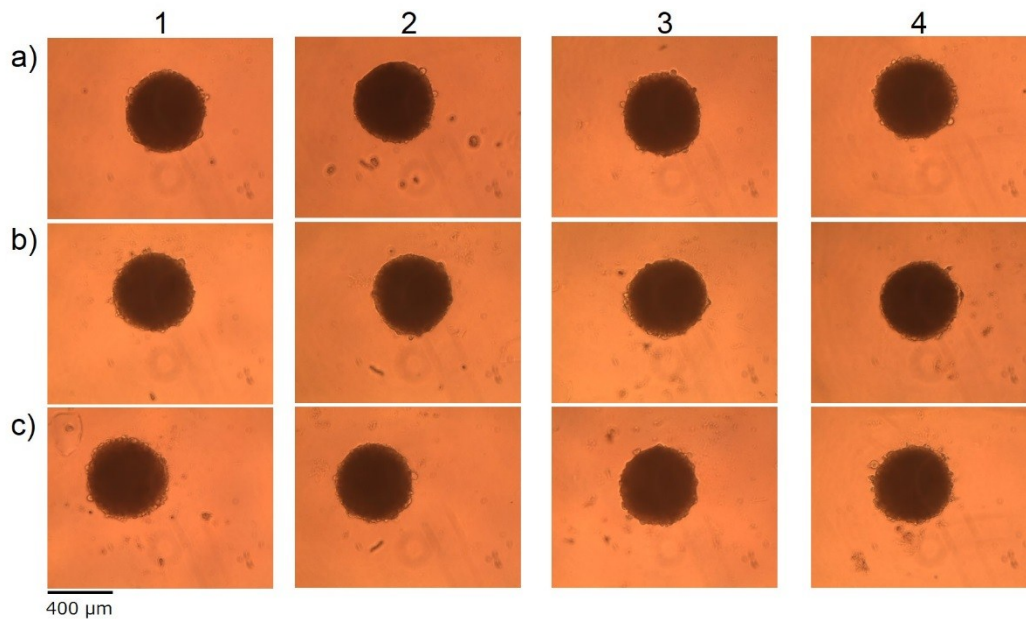

**Figure S-2.** Optical photos of MCS treated with each Ag NP (1: Ag NP ( $\varnothing$  5 nm, citrate), 2: Ag NP ( $\varnothing$  20 nm, citrate), 3: Ag NP ( $\varnothing$  20 nm, PVP), 4: Ag NP ( $\varnothing$  50 nm, citrate). a), b) and c) show the results after 0.5, 24 and 48 hours, respectively.

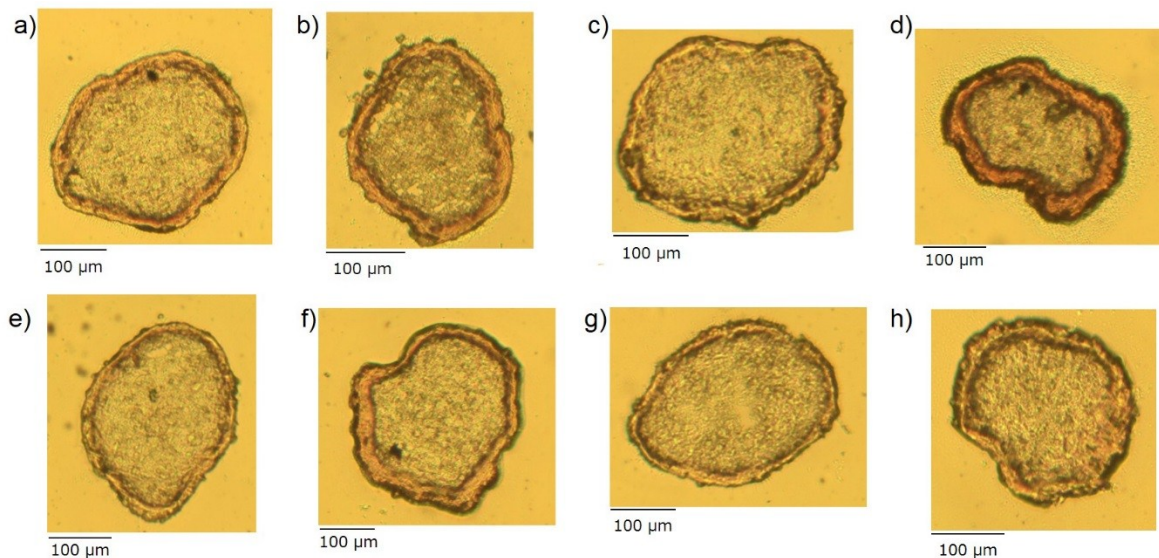

**Figure S-3.** Optical photographs in thin sections of fibroblast MCSs. Samples incubated for 24 h with Ag NPs with diameters of 5 nm (citrate) (a), 20 nm (citrate) (b), 20 nm (PVP) (c), and 50 nm (citrate) (d). Samples incubated for 48 h with Ag NPs with diameters of 5 nm (citrate) (e), 20 nm (citrate) (f), 20 nm (PVP) (g), and 50 nm (citrate) (h).

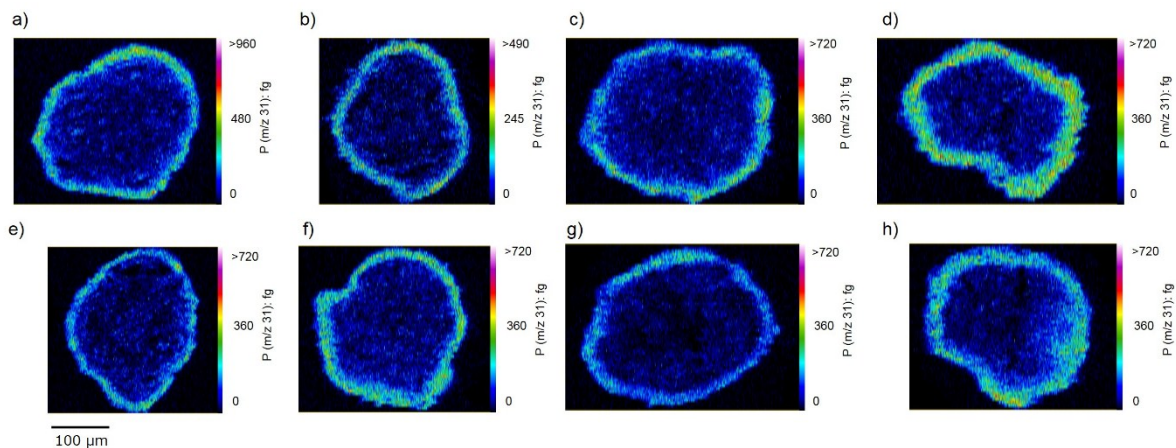

**Figure S-4.** Images of the P concentrations in thin sections of fibroblast MCSs. Samples incubated for 24 h with Ag NPs with diameters of 5 nm (citrate) (a), 20 nm (citrate) (b), 20 nm (PVP) (c), and 50 nm (citrate) (d). Samples incubated for 48 h with Ag NPs with diameters of 5 nm (citrate) (e), 20 nm (citrate) (f), 20 nm (PVP) (g), and 50 nm (citrate) (h).

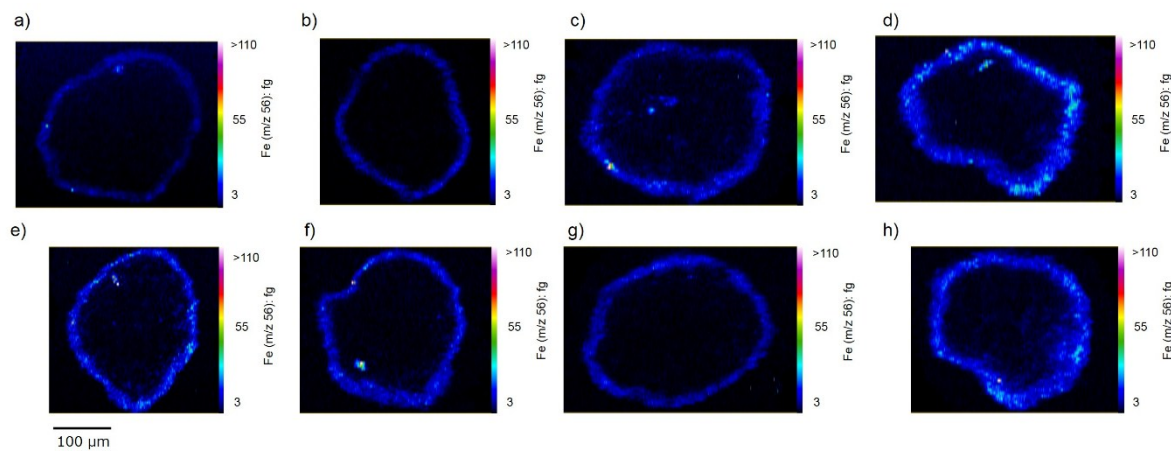

**Figure S-5.** Images of the Fe concentrations in thin sections of fibroblast MCSs. Samples incubated for 24 h with Ag NPs with diameters of 5 nm (citrate) (a), 20 nm (citrate) (b), 20 nm (PVP) (c), and 50 nm (citrate) (d). Samples incubated for 48 h with Ag NPs with diameters of 5 nm (citrate) (e), 20 nm (citrate) (f), 20 nm (PVP) (g), and 50 nm (citrate) (h).

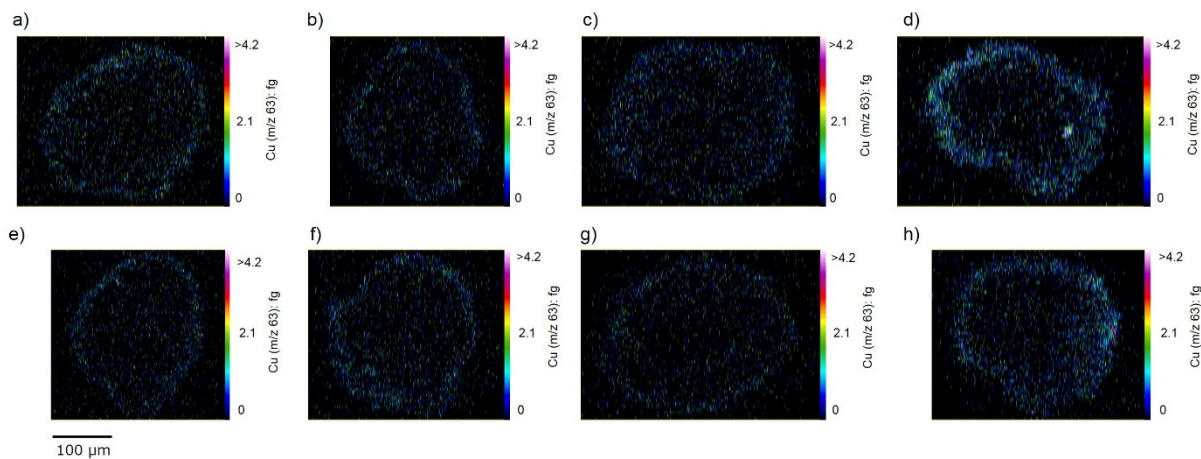

**Figure S-6.** Images of the Cu concentrations in thin sections of fibroblast MCSs. Samples incubated for 24 h with Ag NPs with diameters of 5 nm (citrate) (a), 20 nm (citrate) (b), 20 nm (PVP) (c), and 50 nm (citrate) (d). Samples incubated for 48 h with Ag NPs with diameters of 5 nm (citrate) (e), 20 nm (citrate) (f), 20 nm (PVP) (g), and 50 nm (citrate) (h).

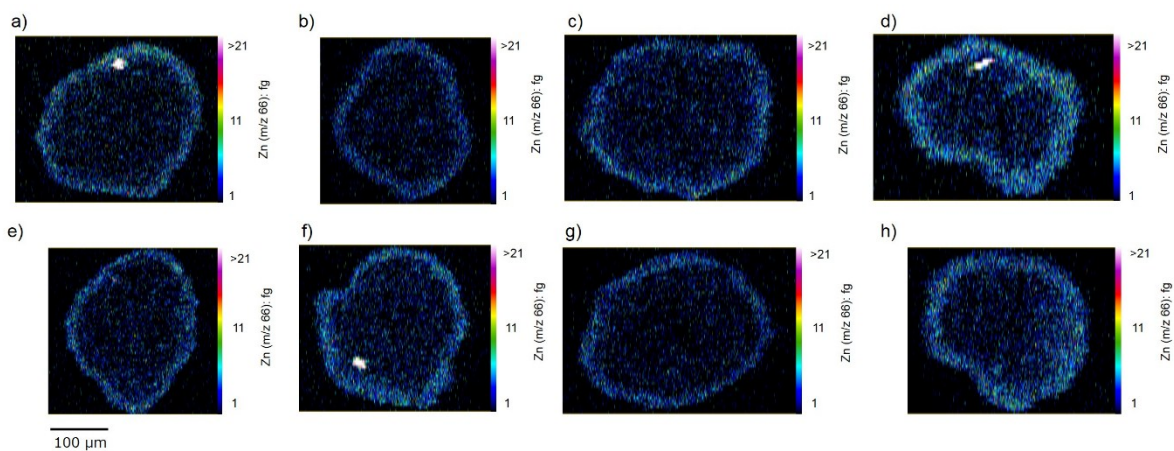

**Figure S-7.** Images of the Zn concentrations in thin sections of fibroblast MCSs. Samples incubated for 24 h with Ag NPs with diameters of 5 nm (citrate) (a), 20 nm (citrate) (b), 20 nm (PVP) (c), and 50 nm (citrate) (d). Samples incubated for 48 h with Ag NPs with diameters of 5 nm (citrate) (e), 20 nm (citrate) (f), 20 nm (PVP) (g), and 50 nm (citrate) (h).

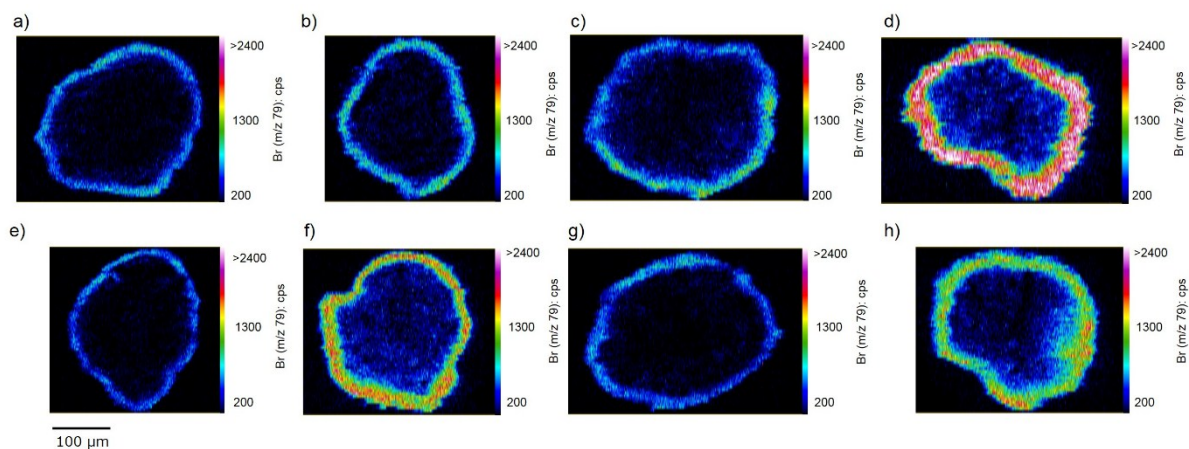

**Figure S-8.** Images of the  $^{79}\text{Br}$  signals in thin sections of fibroblast MCSs. Samples incubated for 24 h with Ag NPs with diameters of 5 nm (citrate) (a), 20 nm (citrate) (b), 20 nm (PVP) (c), and 50 nm (citrate) (d). Samples incubated for 48 h with Ag NPs with diameters of 5 nm (citrate) (e), 20 nm (citrate) (f), 20 nm (PVP) (g), and 50 nm (citrate) (h).

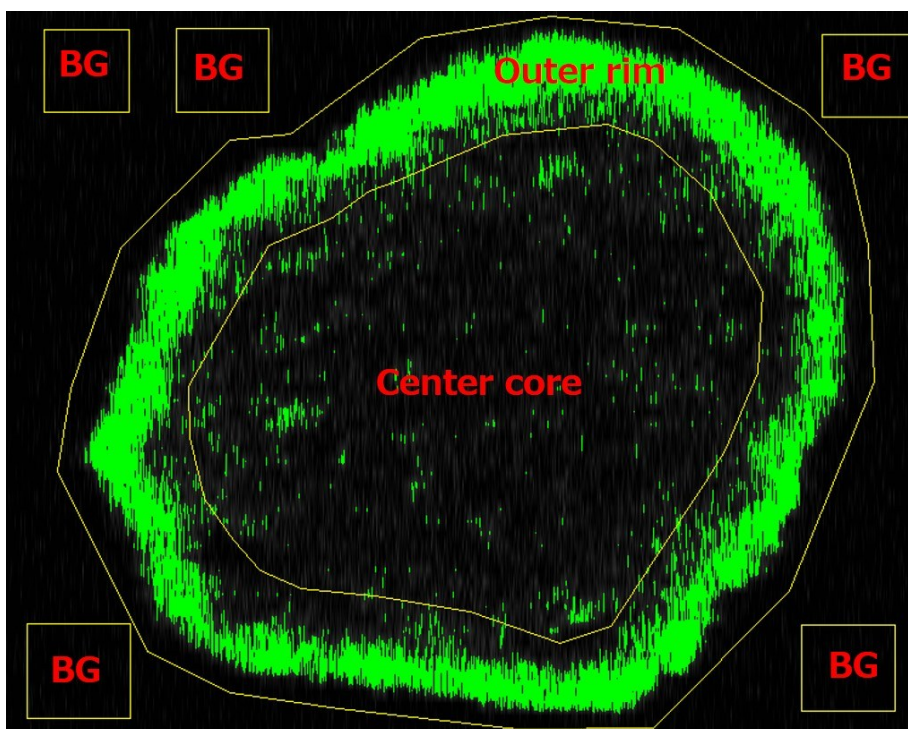

**Figure S-9.** Schematic illustration of each region to estimate signals of interest in the center region. Yellow lines were drawn by a use of drawing mode in ImageJ. As an example, a phosphorous image of a sample treated with Ag NPs ( $\varnothing$  5 nm, citrate) for 24 hours was used. Green color is showing phosphorous signals more than a threshold set. BG: background.

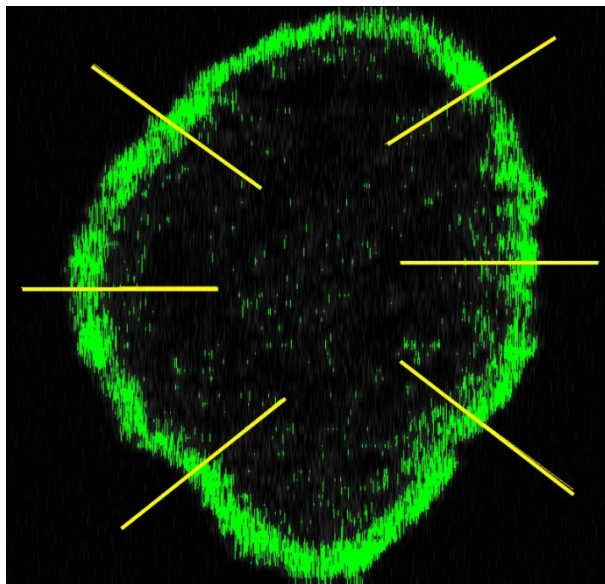

**Figure S-10.** Schematic illustration for line scans with using ImageJ among elemental images.



a)

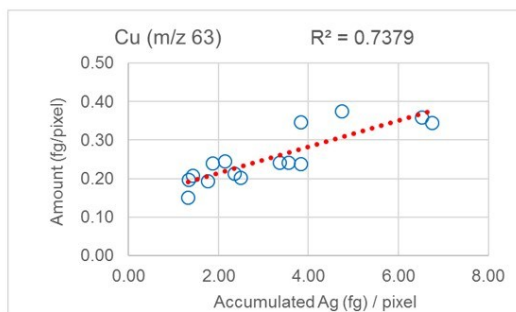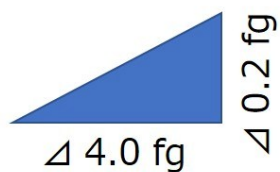

Slope =  $3.4 \times 10^{-2}$

b)

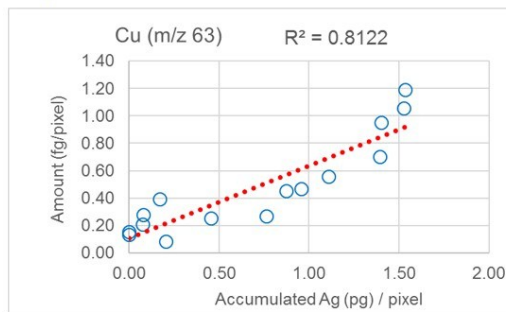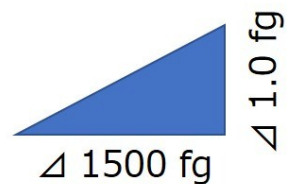

Slope =  $6.7 \times 10^{-4}$

**Figure S-11.** Scatter plots of Cu (m/z 63) amounts (fg) as average values within pixels where varying amounts of Ag accumulated on sections treated with small Ag NPs ( $\varnothing$  5 nm, citrate) and large Ag NPs ( $\varnothing$  50 nm, citrate) for 48 h. Red dashed lines show linear trendlines. A coefficient of determination ( $R^2$ ) is shown in each plot on the upper right.
